# Supplementary material
Source: HighWire-hosted journal article supplement (https://gut.bmj.com/content/gutjnl-2021-324321)
Supplement: inline-supplementary-material-3 [file inline-supplementary-material-3.xlsx]

## Sheet: Average AUCell score
	C3	C0	C2	C1
Sap30	0.0581182	0.0501608	0.0528361	0.0486713
Cebpb	0.501315	0.447209	0.461619	0.481718
Usf1	0.357572	0.334918	0.347071	0.350008
Thap1	0.326858	0.310117	0.31869	0.316927
Gtf2f1	0.393875	0.369599	0.373581	0.367727
Nelfe	0.438166	0.395369	0.392192	0.391433
Xrcc4	0.313923	0.300787	0.304423	0.296126
Bmyc	0.295413	0.33179	0.337986	0.291515
Nfe2	0.0371086	0.0487157	0.0464796	0.0356963
Ybx1	0.27492	0.273581	0.289058	0.273424
Atf3	0.622781	0.58933	0.574073	0.547095
Brf2	0.236213	0.229913	0.228156	0.221961
Bcl3	0.0155765	0.0172402	0.0149372	0.0128822
Dbp	0.0457477	0.0581937	0.0497927	0.0452949
Nfe2l2	0.0508734	0.0528163	0.0380871	0.0372227
Maff	0.025455	0.0372188	0.00759007	0.0111612
Foxa3	0.417018	0.412513	0.359353	0.369346
Ddit3	0.0308533	0.0294055	0.0110589	0.0141222
Cebpd	0.0923627	0.0951235	0.0857531	0.0765563
Tfeb	0.0415959	0.0445312	0.0340678	0.0313751
Junb	0.0653106	0.0754122	0.0384951	0.0346467
Fos	0.181122	0.175234	0.135346	0.120738
Elf3	0.273495	0.274605	0.244775	0.226167
Tbp	0.0775895	0.0722046	0.0691806	0.0633922
E2f4	0.311419	0.300236	0.291896	0.281739
Gabpb1	0.263356	0.267498	0.245666	0.228371
Trp53	0.0352409	0.0314074	0.031741	0.031626
Thap11	0.124763	0.118552	0.111304	0.102562
Foxq1	0.048132	0.0585338	0.0396603	0.0366071
Nr1h3	0.0384136	0.0391522	0.029384	0.0264424
Foxp1	0.00306643	0.00345353	0.000582065	0.00162123
Foxo4	0.00866461	0.00924933	0.00125862	0.00230483
Fosb	0.0470642	0.05523	0.0152107	0.0164777
Jun	0.196491	0.229535	0.0778198	0.0697925
Jund	0.0482441	0.0492298	0.0284549	0.0316751
Nr2f6	0.0251004	0.0260366	0.0132074	0.0125025
Hnf4a	0.041642	0.0443598	0.0227473	0.0212674
Cebpa	0.022755	0.02249	0.00884122	0.0103991
Rxra	0.010203	0.0117745	0.00533552	0.00625537
Stat3	0.0414987	0.0374627	0.0131051	0.0108669
Relb	0.0507081	0.0474865	0.0385561	0.039094
Tcf3	0.0124493	0.014546	0.00910272	0.00971746
Zbtb33	0.0602596	0.0607476	0.0516171	0.0518357
Klf6	0.0332401	0.0357779	0.0193247	0.0217175
Nrf1	0.0783936	0.0700504	0.0552173	0.0605549
Bdp1	0.0464331	0.0425172	0.0300452	0.0322455
Polr3a	0.0687984	0.0597025	0.0431473	0.0450615
Elf2	0.236789	0.223292	0.180065	0.183923
Elf1	0.244031	0.238317	0.187124	0.189132
Bhlhe40	0.264198	0.26459	0.221172	0.213004
Smarca4	0.212919	0.199518	0.166515	0.167524
Myc	0.268295	0.235604	0.208123	0.210867
Zfp110	0.118686	0.110333	0.0907045	0.096575
Rest	0.0953292	0.0886788	0.0721678	0.0762036
Cux1	0.101637	0.0987985	0.0865656	0.0788686
Arntl	0.107759	0.108769	0.0929808	0.0869928
Irf3	0.122638	0.113616	0.0987503	0.0918778
Rela	0.300981	0.284271	0.253412	0.245134
Irf1	0.23461	0.220824	0.193856	0.183359
Usf2	0.18457	0.174457	0.154264	0.144874
Nr3c1	0.324577	0.317035	0.280237	0.262394
Atf1	0.262623	0.241208	0.229792	0.227982
Hdac2	0.194175	0.182132	0.174997	0.174176
Max	0.277526	0.25515	0.233144	0.23006
Taf7	0.212345	0.200527	0.178179	0.178837
Creb3	0.063935	0.0457879	0.0397611	0.0479089
Atf6b	0.0443103	0.0271237	0.0246379	0.0251762
Atf5	0.0710071	0.029508	0.0206929	0.0233557
Zfp143	0.224387	0.221805	0.211194	0.200831
Stat1	0.119884	0.110104	0.108511	0.110556
Cebpg	0.00428483	0.00397631	0.00263079	0.00550875
Npdc1	0.0114947	0.00957374	0.00742798	0.0111472
Tgif1	0.00635751	0.00740179	0.00255049	0.00608422
Zfp384	0.0133362	0.0123334	0.00667801	0.0108645
Polr3g	0.0132802	0.0118087	0.00735604	0.0109146
E2f6	0.0655991	0.0586059	0.0534274	0.0583032
Etv3	0.0188231	0.0177893	0.0106773	0.0155983
Nr2c2	0.0105657	0.0094747	0.00414824	0.00786272
Srf	0.0157017	0.0140625	0.00791501	0.0136823
Mxi1	0.0252313	0.0236643	0.0163751	0.0268572
Esrra	0.0256042	0.0247489	0.0154556	0.0238357
Ets1	0.0284291	0.026532	0.0184716	0.0273002
Tbl1xr1	0.0171513	0.0154719	0.0111506	0.0151504
Supt20	0.0197101	0.0161165	0.00999952	0.0179646
Ezh2	0.0338839	0.0316979	0.0240697	0.0310064
Ubtf	0.0827355	0.0715302	0.0561591	0.0718185
Gabpa	0.0955529	0.0867145	0.0636081	0.0798675
Hcfc1	0.0518036	0.0465496	0.0305795	0.043856
Ctcf	0.0447981	0.0398896	0.025505	0.0406975
Zmiz1	0.0568772	0.0550606	0.0349914	0.0511733
Bclaf1	0.112718	0.106987	0.0764774	0.0994667
Kdm5a	0.0676428	0.0612548	0.0384122	0.0566589
Zfp768	0.0165944	0.0155838	0.0129833	0.0139539
Atf6	0.0441478	0.0262797	0.0158086	0.0214912
Maz	0.0795929	0.0719996	0.0519821	0.0605352
Egr1	0.137214	0.119989	0.0841046	0.099321
Yy1	0.124761	0.116511	0.0875622	0.102223
Srebf1	0.118891	0.117709	0.0815684	0.0966171
Srebf2	0.125246	0.116161	0.0863986	0.100837
Brf1	0.0939381	0.0881944	0.0644789	0.0725321
Ets2	0.154595	0.139876	0.102581	0.112992
Kdm5b	0.111223	0.101762	0.0742528	0.085007
Rad21	0.102505	0.0952896	0.0752734	0.0846291
Cebpz	0.0642039	0.0600805	0.0450767	0.0512191
Etv6	0.0565081	0.0578849	0.0385303	0.046835
Rcor1	0.0153064	0.0149868	0.00703531	0.0112656
Erf	0.0263309	0.0279872	0.0131671	0.0194732
Taf1	0.0527858	0.0525313	0.0316412	0.0428989
Elk4	0.0616325	0.057205	0.0346133	0.0480527
Sin3a	0.0411397	0.0418112	0.0246644	0.0314525
Creb1	0.0390385	0.0385894	0.0256959	0.0333555
Chd2	0.0288615	0.0287638	0.0138158	0.0200372
Rbbp5	0.0370166	0.0360542	0.0239261	0.0306401
Hdac6	0.027252	0.0249818	0.0161506	0.0208699
Pml	0.0444743	0.0422241	0.0295284	0.0360519
Foxo1	0.00730179	0.00869873	0.0049106	0.00658377
Tfe3	0.0100401	0.00967553	0.00751136	0.00921541
Bach1	0.00682586	0.00618316	0.00307871	0.00508637
Arnt	0.00924083	0.0104693	0.00547452	0.00825168
Mitf	0.00870178	0.00790519	0.00358034	0.00553296
Atf4	0.0114986	0.0128034	0.00566457	0.00953531
Ahr	0.00442335	0.00461386	0.00196479	0.00407697
Hes1	0.00852434	0.0115028	0.00438097	0.00469315
Mlxipl	0.00419507	0.00529284	0.00177297	0.0024936
Creb3l2	0.00320067	0.00290939	0.00176982	0.00365415
Rora	0.00477201	0.00465647	0.00245031	0.00580206
Klf15	0.00833334	0.0118456	0.0101114	0.0108882
Nfil3	0.00273709	0.00336871	0.00334411	0.00723087
Rarg	0.0126787	0.0109129	0.0108965	0.012707
Smarcc2	0.00770109	0.00670869	0.00619358	0.00646779
Klf3	0.0151438	0.021193	0.0148923	0.0128092
Mafb	0.0223286	0.0497063	0.0381505	0.0204703
Nr1h4	0.00934348	0.0172533	0.0179873	0.013916
Nr1i3	0.0800672	0.0541495	0.0534515	0.0458906
Ppara	0.0119377	0.00995623	0.00602993	0.00861837
Irf7	0.0255275	0.0319489	0.0313799	0.0306668
Mlx	0.00308873	0.00416832	0.00596658	0.0114751
Irf9	0.00032081	0.000557098	0.000691763	0.00231497
Pole4	0.00956589	0.0103234	0.0137311	0.0207075
Sox4	0.00460638	0.00488698	0.00145849	0.00333219
Mafg	0.00300417	0.00144952	0.00332784	0.00261541
Nfkb2	0.00662229	0.00512507	0.00350447	0.00368355

## Sheet: Differential regulons
	p_val	avg_log2FC	pct.1	pct.2	p_val_adj	cluster	TF
Atf5	0	0.0634318	0.998	0.986	0	3	Atf5
Myc	0	0.0568914	1	1	0	3	Myc
Atf3	0	0.0481873	1	1	0	3	Atf3
Elf2	0	0.046693	1	1	0	3	Elf2
Nelfe	0	0.0459606	1	1	0	3	Nelfe
Fos	0	0.0454766	1	1	0	3	Fos
Rela	0	0.0443279	1	1	0	3	Rela
Egr1	0	0.0440186	1	1	0	3	Egr1
Elf1	0	0.0439711	1	1	0	3	Elf1
Ets2	0	0.0436094	1	1	0	3	Ets2
Max	0	0.042942	1	1	0	3	Max
Nr3c1	0	0.0415155	1	1	0	3	Nr3c1
Irf1	0	0.0412719	1	1	0	3	Irf1
Smarca4	0	0.0408975	1	1	0	3	Smarca4
Nr1i3	0	0.0395669	1	1	0	3	Nr1i3
Atf6	0	0.0312077	1	1	0	3	Atf6
Kdm5b	0	0.0299071	1	1	0	3	Kdm5b
Irf3	0	0.0272773	1	1	0	3	Irf3
Atf6b	0	0.0258649	1	1	0	3	Atf6b
Polr3a	0	0.0256665	1	1	0	3	Polr3a
Cux1	0	0.0177749	1	1	0	3	Cux1
Bdp1	8.54e-299	0.0152106	1	1	1.21e-296	3	Bdp1
Usf2	1.08e-296	0.0325675	1	1	1.54e-294	3	Usf2
Taf7	2.64e-294	0.0309228	1	1	3.74e-292	3	Taf7
Zfp110	2.68e-294	0.0241248	1	1	3.8e-292	3	Zfp110
Tbp	5.25e-289	0.0127582	1	1	7.45e-287	3	Tbp
Creb3	2.24e-286	0.0258292	1	1	3.18e-284	3	Creb3
Maz	2.96e-284	0.0229303	1	1	4.21e-282	3	Maz
Atf1	9.37e-284	0.0338998	1	1	1.33e-281	3	Atf1
Nrf1	1.97e-282	0.021171	1	1	2.8e-280	3	Nrf1
Rest	2.46e-274	0.0206557	1	1	3.5e-272	3	Rest
Brf1	7.47e-266	0.0235375	1	1	1.06e-263	3	Brf1
Elf3	1.91e-258	0.0283743	1	1	2.72e-256	3	Elf3
Srebf2	1.03e-252	0.0290816	1	1	1.47e-250	3	Srebf2
Thap11	6.49e-249	0.0182045	1	1	9.22e-247	3	Thap11
Jund	4.62e-241	0.0151368	1	1	6.57e-239	3	Jund
E2f4	2.93e-240	0.0225086	1	1	4.16e-238	3	E2f4
Bhlhe40	1.41e-233	0.0348454	1	1	2e-231	3	Bhlhe40
Relb	2.7e-232	0.0119517	1	1	3.84e-230	3	Relb
Sap30	8.81e-232	0.0107292	1	1	1.25e-229	3	Sap30
Stat3	9.19e-230	0.0283885	0.971	0.894	1.3e-227	3	Stat3
Yy1	1.67e-223	0.0272186	1	1	2.37e-221	3	Yy1
Elk4	9.76e-222	0.0186537	1	1	1.39e-219	3	Elk4
Hnf4a	1.65e-215	0.0160391	1	1	2.34e-213	3	Hnf4a
Nr2f6	9.27e-210	0.0105196	1	0.998	1.32e-207	3	Nr2f6
Fosb	2.65e-209	0.0231611	0.999	0.989	3.76e-207	3	Fosb
Gabpa	3.58e-209	0.0229747	1	1	5.08e-207	3	Gabpa
Ubtf	5.03e-208	0.0201373	1	1	7.15e-206	3	Ubtf
Jun	1.19e-205	0.0818385	0.999	0.999	1.7e-203	3	Jun
Rad21	1.94e-197	0.0215431	1	1	2.75e-195	3	Rad21
Ddit3	6.67e-197	0.0167471	0.999	0.991	9.47e-195	3	Ddit3
Hdac6	2.91e-194	0.00855404	1	1	4.13e-192	3	Hdac6
Junb	1.32e-191	0.020062	1	1	1.87e-189	3	Junb
Cebpz	1.58e-189	0.0153915	1	1	2.24e-187	3	Cebpz
Foxo4	5.8e-189	0.00584079	0.889	0.602	8.23e-187	3	Foxo4
Arntl	1.46e-187	0.0147187	1	1	2.07e-185	3	Arntl
Pml	5.45e-187	0.0108359	1	1	7.74e-185	3	Pml
Cebpa	1.93e-185	0.011772	0.984	0.936	2.74e-183	3	Cebpa
Srebf1	1.31e-182	0.023865	1	1	1.86e-180	3	Srebf1
Gtf2f1	6.64e-179	0.0250264	1	1	9.43e-177	3	Gtf2f1
Nr1h3	1.85e-178	0.00913498	1	1	2.62e-176	3	Nr1h3
Cebpb	4.11e-170	0.0363816	1	1	5.83e-168	3	Cebpb
Hdac2	4.55e-167	0.0205232	1	1	6.47e-165	3	Hdac2
Chd2	1.16e-166	0.0101348	1	1	1.64e-164	3	Chd2
Stat1	5.93e-165	0.0129587	1	1	8.42e-163	3	Stat1
Kdm5a	4.53e-160	0.0189602	1	1	6.43e-158	3	Kdm5a
Hcfc1	5.84e-159	0.0142486	1	1	8.29e-157	3	Hcfc1
Zfp143	1e-155	0.0156562	1	1	1.42e-153	3	Zfp143
Gabpb1	2.16e-152	0.0186342	1	1	3.06e-150	3	Gabpb1
Sin3a	3.52e-152	0.0105838	1	1	5e-150	3	Sin3a
Klf6	1.98e-146	0.00976119	1	1	2.81e-144	3	Klf6
Taf1	8.18e-141	0.012682	1	1	1.16e-138	3	Taf1
Foxa3	4.68e-137	0.0354133	1	1	6.65e-135	3	Foxa3
Rcor1	1.19e-136	0.00533924	1	0.999	1.7e-134	3	Rcor1
Bclaf1	9.88e-136	0.0213417	1	1	1.4e-133	3	Bclaf1
Nr2c2	1.88e-132	0.00436972	0.999	0.988	2.67e-130	3	Nr2c2
E2f6	2.54e-132	0.0114525	1	1	3.61e-130	3	E2f6
Tfeb	7.83e-132	0.00652929	1	1	1.11e-129	3	Tfeb
Mitf	2.03e-131	0.00400228	0.986	0.974	2.88e-129	3	Mitf
Trp53	2.65e-124	0.00511781	1	1	3.76e-122	3	Trp53
Rbbp5	2.05e-123	0.00850658	1	1	2.92e-121	3	Rbbp5
Erf	1.85e-117	0.00751939	1	1	2.62e-115	3	Erf
Foxp1	1.86e-115	0.00149177	0.908	0.723	2.65e-113	3	Foxp1
Etv6	7.73e-114	0.0105915	1	1	1.1e-111	3	Etv6
Xrcc4	1.1e-109	0.0154254	1	1	1.56e-107	3	Xrcc4
Ctcf	6.71e-108	0.0114561	1	1	9.53e-106	3	Ctcf
Etv3	1.69e-105	0.00520962	1	1	2.39e-103	3	Etv3
Srf	7.45e-105	0.00476258	0.999	1	1.06e-102	3	Srf
Brf2	5.6e-104	0.0114291	1	1	7.95e-102	3	Brf2
Polr3g	4.59e-100	0.00419605	1	0.999	6.52e-98	3	Polr3g
Zfp384	6.08e-97	0.00427404	1	0.999	8.63e-95	3	Zfp384
Creb1	6.14e-97	0.00794997	1	1	8.72e-95	3	Creb1
Cebpd	2.63e-95	0.00880466	1	1	3.74e-93	3	Cebpd
Zbtb33	1.94e-93	0.00710157	1	1	2.76e-91	3	Zbtb33
Zfp768	4.61e-92	0.00325184	1	1	6.54e-90	3	Zfp768
Supt20	3.94e-90	0.00631152	1	1	5.6e-88	3	Supt20
Ezh2	8.2e-90	0.00613717	1	1	1.16e-87	3	Ezh2
Bach1	4.56e-88	0.00264984	0.989	0.975	6.48e-86	3	Bach1
Zmiz1	6.35e-88	0.0115043	1	1	9.02e-86	3	Zmiz1
Thap1	3.63e-75	0.0130891	1	1	5.16e-73	3	Thap1
Tbl1xr1	2.97e-73	0.00412016	1	1	4.22e-71	3	Tbl1xr1
Nfe2l2	2.7e-65	0.0106144	1	1	3.84e-63	3	Nfe2l2
Ets1	2.64e-62	0.00514042	1	1	3.74e-60	3	Ets1
Nfkb2	6.35e-60	0.00352261	0.734	0.605	9.02e-58	3	Nfkb2
Usf1	9.69e-60	0.0147978	1	1	1.38e-57	3	Usf1
Esrra	2.69e-53	0.00502454	1	1	3.82e-51	3	Esrra
Smarcc2	3.79e-49	0.00173996	0.998	0.997	5.38e-47	3	Smarcc2
Sox4	9.36e-44	0.00169551	0.867	0.802	1.33e-41	3	Sox4
Npdc1	1e-41	0.00267229	0.998	0.994	1.42e-39	3	Npdc1
Tcf3	1.2e-41	0.00158942	1	1	1.7e-39	3	Tcf3
Rxra	3.49e-40	0.00308033	0.995	0.996	4.96e-38	3	Rxra
Tfe3	1.33e-37	0.00155685	1	1	1.89e-35	3	Tfe3
Ppara	1.03e-31	0.00497939	0.79	0.759	1.46e-29	3	Ppara
Arnt	3.61e-27	0.00126045	0.999	0.998	5.12e-25	3	Arnt
Maff	5.26e-23	0.00794509	0.709	0.616	7.47e-21	3	Maff
Mxi1	1.95e-22	0.00311935	1	1	2.77e-20	3	Mxi1
Atf4	2.17e-20	0.00249537	0.996	0.99	3.09e-18	3	Atf4
Rarg	1.77e-18	0.00155576	1	1	2.52e-16	3	Rarg
Foxq1	5.98e-18	0.00371341	0.996	1	8.5e-16	3	Foxq1
Mlxipl	4.98e-16	0.00123135	0.665	0.574	7.08e-14	3	Mlxipl
Mafg	1.12e-11	0.00091464	0.584	0.523	1.58e-09	3	Mafg
Ahr	5.55e-11	0.000986671	0.883	0.841	7.88e-09	3	Ahr
Hes1	8.76e-11	0.00201769	0.54	0.464	1.24e-08	3	Hes1
Foxo1	2.3e-08	0.000525737	1	0.999	3.27e-06	3	Foxo1
Cebpg	1.28e-05	0.000102475	0.557	0.614	0.00182442	3	Cebpg
2001-06-01	0	0.173762	1	0.999	0	0	Jun
Fos1	0	0.0513785	1	1	0	0	Fos
Elf11	0	0.0501713	1	1	0	0	Elf1
Fosb1	0	0.0486367	1	0.984	0	0	Fosb
Bhlhe401	0	0.0483815	1	1	0	0	Bhlhe40
Junb1	0	0.0480252	1	1	0	0	Junb
Nr3c11	0	0.0443739	1	1	0	0	Nr3c1
Foxa31	0	0.0415194	1	1	0	0	Foxa3
Elf31	0	0.0407156	1	1	0	0	Elf3
Elf21	0	0.0399743	1	1	0	0	Elf2
Maff1	0	0.0356675	0.798	0.538	0	0	Maff
Gabpb11	0	0.0325904	1	1	0	0	Gabpb1
Rela1	0	0.0324656	1	1	0	0	Rela
Irf11	0	0.0319866	1	1	0	0	Irf1
Mafb	0	0.0317484	0.892	0.751	0	0	Mafb
Smarca41	0	0.0317316	1	1	0	0	Smarca4
Ets21	0	0.0316931	1	1	0	0	Ets2
Stat31	0	0.0303582	0.988	0.858	0	0	Stat3
Srebf11	0	0.0303203	1	1	0	0	Srebf1
Hnf4a1	0	0.0275785	1	1	0	0	Hnf4a
Egr11	0	0.026953	1	1	0	0	Egr1
Foxq11	0	0.0265211	1	0.999	0	0	Foxq1
Usf21	0	0.0258566	1	1	0	0	Usf2
Bmyc	0	0.0258164	1	1	0	0	Bmyc
Jund1	0	0.0227153	1	1	0	0	Jund
Kdm5b1	0	0.0222692	1	1	0	0	Kdm5b
Srebf21	0	0.0221055	1	1	0	0	Srebf2
Arntl1	0	0.0220803	1	1	0	0	Arntl
Yy11	0	0.021179	1	1	0	0	Yy1
Taf71	0	0.0209479	1	1	0	0	Taf7
Myc1	0	0.0209146	1	1	0	0	Myc
Brf11	0	0.0207092	1	1	0	0	Brf1
Atf31	0	0.0205324	1	1	0	0	Atf3
Max1	0	0.0202405	1	1	0	0	Max
Ddit31	0	0.0198161	0.999	0.988	0	0	Ddit3
Irf31	0	0.0197228	1	1	0	0	Irf3
Cux11	0	0.0186673	1	1	0	0	Cux1
Klf61	0	0.0186509	1	1	0	0	Klf6
Nfe2l21	0	0.0185005	1	1	0	0	Nfe2l2
Cebpd1	0	0.017497	1	1	0	0	Cebpd
Etv61	0	0.0172849	1	1	0	0	Etv6
Zfp1431	0	0.0167903	1	1	0	0	Zfp143
Taf11	0	0.016787	1	1	0	0	Taf1
Zfp1101	0	0.0166636	1	1	0	0	Zfp110
Polr3a1	0	0.0164817	1	1	0	0	Polr3a
Elk41	0	0.0163924	1	1	0	0	Elk4
Nr2f61	0	0.0163402	1	0.997	0	0	Nr2f6
Maz1	0	0.0159788	1	1	0	0	Maz
Sin3a1	0	0.0158452	1	1	0	0	Sin3a
Cebpa1	0	0.0155054	0.993	0.914	0	0	Cebpa
Dbp	0	0.0154562	1	1	0	0	Dbp
Tfeb1	0	0.0150156	1	1	0	0	Tfeb
Rest1	0	0.0149755	1	1	0	0	Rest
Nr1h31	0	0.0140089	1	1	0	0	Nr1h3
Erf1	0	0.0137589	1	1	0	0	Erf
Chd21	0	0.0136245	1	1	0	0	Chd2
Thap111	0	0.0128284	1	1	0	0	Thap11
Bdp11	0	0.0126231	1	1	0	0	Bdp1
Cebpz1	0	0.0125814	1	1	0	0	Cebpz
Nfe2	0	0.0125522	1	1	0	0	Nfe2
E2f41	0	0.012133	1	1	0	0	E2f4
Nrf11	0	0.0120377	1	1	0	0	Nrf1
Zbtb331	0	0.0106863	1	1	0	0	Zbtb33
Pml1	0	0.0101064	1	1	0	0	Pml
Relb1	0	0.00964613	1	1	0	0	Relb
Foxo41	0	0.00922368	0.893	0.496	0	0	Foxo4
Rxra1	0	0.00756962	0.999	0.994	0	0	Rxra
Tcf31	0	0.00664994	1	1	0	0	Tcf3
Rcor11	0	0.0065993	1	0.999	0	0	Rcor1
Arnt1	0	0.00435371	1	0.998	0	0	Arnt
Foxo11	0	0.00371839	1	0.999	0	0	Foxo1
Foxp11	0	0.00286939	0.911	0.654	0	0	Foxp1
Rbbp51	6.5e-302	0.00959138	1	1	9.23e-300	0	Rbbp5
Creb11	8.95e-301	0.0099081	1	1	1.27e-298	0	Creb1
Hdac61	5.4e-300	0.00687145	1	1	7.66e-298	0	Hdac6
Sox41	1.3e-289	0.00291634	0.907	0.759	1.85e-287	0	Sox4
Rad211	2.16e-266	0.0151542	1	1	3.06e-264	0	Rad21
Tbp1	3.27e-246	0.0065411	1	1	4.64e-244	0	Tbp
Atf61	4.11e-241	0.00512708	1	1	5.84e-239	0	Atf6
Mlxipl1	1.79e-238	0.00404543	0.713	0.517	2.54e-236	0	Mlxipl
Mitf1	7.9e-232	0.00374546	0.987	0.97	1.12e-229	0	Mitf
Atf41	2.14e-225	0.00619594	0.995	0.988	3.04e-223	0	Atf4
Bcl3	1.88e-219	0.00465133	1	1	2.66e-217	0	Bcl3
Etv31	9.7e-215	0.00490421	1	1	1.38e-212	0	Etv3
Hes11	2.96e-213	0.00914365	0.616	0.399	4.21e-211	0	Hes1
Nr2c21	2.63e-207	0.00361781	0.997	0.985	3.73e-205	0	Nr2c2
Klf3	6.21e-197	0.0104069	0.809	0.73	8.82e-195	0	Klf3
Gabpa1	1.37e-179	0.0137759	1	1	1.95e-177	0	Gabpa
Bclaf11	4.28e-165	0.0179267	1	1	6.08e-163	0	Bclaf1
Kdm5a1	3.18e-143	0.0128531	1	1	4.52e-141	0	Kdm5a
Zfp3841	1.46e-137	0.00368247	0.999	0.999	2.07e-135	0	Zfp384
Atf11	1.44e-133	0.00912954	1	1	2.04e-131	0	Atf1
Zmiz11	9.83e-131	0.0119662	1	1	1.4e-128	0	Zmiz1
Hcfc11	3.3e-106	0.00857856	1	1	4.68e-104	0	Hcfc1
Irf7	3.92e-100	0.00243776	1	1	5.56e-98	0	Irf7
Bach11	1.74e-98	0.00222946	0.982	0.974	2.46e-96	0	Bach1
Polr3g1	4.79e-92	0.00257269	1	0.999	6.81e-90	0	Polr3g
Zfp7681	4.81e-89	0.00227903	1	1	6.84e-87	0	Zfp768
Esrra1	2.93e-83	0.00504381	1	1	4.17e-81	0	Esrra
Srf1	5.15e-83	0.00299438	1	0.999	7.32e-81	0	Srf
Nr1h4	4.55e-71	0.00362749	1	0.997	6.47e-69	0	Nr1h4
Hdac21	5.76e-71	0.00601462	1	1	8.17e-69	0	Hdac2
Brf21	2.07e-68	0.00451344	1	1	2.94e-66	0	Brf2
Ezh21	5.03e-58	0.00378242	1	1	7.14e-56	0	Ezh2
Klf15	4.03e-49	0.0022524	0.999	0.999	5.73e-47	0	Klf15
Tfe31	4.44e-38	0.0013404	1	1	6.3e-36	0	Tfe3
Tgif1	3.96e-35	0.00359276	0.815	0.787	5.62e-33	0	Tgif1
Ctcf1	2.88e-33	0.00541685	1	1	4.09e-31	0	Ctcf
Nfkb21	8.97e-33	0.00157844	0.646	0.602	1.27e-30	0	Nfkb2
Atf51	2.6e-32	0.000723872	0.992	0.985	3.7e-30	0	Atf5
Ppara1	3.36e-30	0.00254311	0.768	0.759	4.77e-28	0	Ppara
Ets11	1.1e-29	0.00300868	1	1	1.56e-27	0	Ets1
Tbl1xr11	1.39e-28	0.00203789	1	1	1.97e-26	0	Tbl1xr1
Ahr1	6.29e-28	0.00175568	0.856	0.839	8.93e-26	0	Ahr
Ubtf1	1.61e-26	0.00490979	1	1	2.29e-24	0	Ubtf
Nr1i31	4.88e-11	0.00127593	1	1	6.93e-09	0	Nr1i3
E2f61	5.19e-06	0.00134921	1	1	0.000736466	0	E2f6
Supt201	0.000207372	0.000957649	1	1	0.0294469	0	Supt20
Bmyc1	0	0.031097	1	1	0	2	Bmyc
Ybx1	0	0.0173254	1	1	0	2	Ybx1
Nfe21	1.43e-212	0.00686226	1	1	2.04e-210	2	Nfe2
Nr1h41	8.38e-131	0.00449793	1	0.997	1.19e-128	2	Nr1h4
Sap301	3.65e-110	0.00328065	1	1	5.19e-108	2	Sap30
Xrcc41	1.89e-58	0.0045986	1	1	2.68e-56	2	Xrcc4
Thap12	1.01e-36	0.00387074	1	1	1.43e-34	2	Thap1
Mafb1	2.44e-30	0.00664854	0.855	0.781	3.47e-28	2	Mafb
Gtf2f11	9.31e-21	0.00202045	1	1	1.32e-18	2	Gtf2f1
Irf71	8.6e-17	0.00107741	1	1	1.22e-14	2	Irf7
Mafg1	1.07e-13	0.0016861	0.562	0.519	1.52e-11	2	Mafg
Usf11	6.7e-13	0.00290239	1	1	9.52e-11	2	Usf1
Brf22	4.28e-10	0.00122722	1	1	6.07e-08	2	Brf2
Cebpb1	0	0.0214578	1	1	0	1	Cebpb
Pole4	0	0.013191	0.977	0.933	0	1	Pole4
Mlx	0	0.00976694	0.899	0.708	0	1	Mlx
Mxi11	0	0.0078052	1	1	0	1	Mxi1
Nfil3	0	0.00568192	0.984	0.916	0	1	Nfil3
Irf9	0	0.00251168	0.726	0.353	0	1	Irf9
Supt202	4.93e-290	0.0049685	1	1	7e-288	1	Supt20
Npdc11	1.73e-277	0.00294304	1	0.992	2.45e-275	1	Npdc1
Ets12	9.59e-220	0.00469973	1	1	1.36e-217	1	Ets1
Ctcf2	1.33e-211	0.00720814	1	1	1.88e-209	1	Ctcf
Creb3l21	9.72e-180	0.00158968	0.895	0.806	1.38e-177	1	Creb3l2
Cebpg1	1.34e-179	0.00281935	0.716	0.553	1.9e-177	1	Cebpg
Usf12	4.52e-160	0.00819425	1	1	6.42e-158	1	Usf1
Rarg1	8.58e-157	0.00221428	1	1	1.22e-154	1	Rarg
Creb31	1.54e-134	0.0023523	1	1	2.19e-132	1	Creb3
Srf2	7.23e-124	0.00221519	1	1	1.03e-121	1	Srf
Ubtf2	4.05e-123	0.00557593	1	1	5.75e-121	1	Ubtf
Tgif11	5.72e-123	0.00076948	0.887	0.749	8.12e-121	1	Tgif1
Esrra2	9.43e-112	0.00315896	1	1	1.34e-109	1	Esrra
Zmiz12	2.8e-102	0.00402014	1	1	3.98e-100	1	Zmiz1
Ahr2	5.62e-78	0.000607124	0.897	0.817	7.98e-76	1	Ahr
Hcfc12	1.01e-75	0.00303715	1	1	1.44e-73	1	Hcfc1
Kdm5a2	3.37e-71	0.00349152	1	1	4.78e-69	1	Kdm5a
Ezh22	2.98e-69	0.0023652	1	1	4.23e-67	1	Ezh2
Rora1	1.51e-62	0.00273682	0.547	0.464	2.14e-60	1	Rora
Tbl1xr12	3.04e-57	0.00137247	1	1	4.32e-55	1	Tbl1xr1
Mafg2	3.35e-47	0.000413475	0.592	0.496	4.76e-45	1	Mafg
Bclaf12	1.26e-44	0.00318038	1	1	1.78e-42	1	Bclaf1
Zfp3842	1.96e-32	0.000545655	1	0.999	2.79e-30	1	Zfp384
Polr3g2	3.47e-25	0.00066814	1	0.999	4.92e-23	1	Polr3g
E2f62	6.71e-22	0.000741011	1	1	9.52e-20	1	E2f6
Tfe32	5.38e-20	0.00035874	1	1	7.64e-18	1	Tfe3
Gabpa2	2.32e-17	7.16e-05	1	1	3.29e-15	1	Gabpa
Nr2c22	6.53e-16	0.000158859	0.998	0.985	9.28e-14	1	Nr2c2
Etv32	2.87e-15	0.000239568	1	1	4.08e-13	1	Etv3
Thap13	1.58e-14	0.0015918	1	1	2.25e-12	1	Thap1
Klf151	4.69e-09	0.000205495	1	0.999	6.65e-07	1	Klf15
