# Supplementary material
Source: HighWire-hosted journal article supplement (https://gut.bmj.com/content/gutjnl-2021-324321)
Supplement: inline-supplementary-material-6 [file inline-supplementary-material-6.xlsx]

## Sheet: qPCR
mProm1-qF: CTCCCATCAGTGGATAGAGAACT
mProm1-qR: ATACCCCCTTTTGACGAGGCT
mHprt-qF: TCAGTCAACGGGGGACATAAA
mHprt-qR: GGGGCTGTACTGCTTAACCAG
mAfp-qF:ACCTTCCTGTCTCAGTCATTCT
mAfp-qR:CCTGACATCCAGGTAGATTTCCA
mGpc3-qF:CCAGGTTTCCAAGTCACTG
mGpc3-qR:CTTGAGGTGGTCGGTAGTGT
mGolm1-qF:ATGATGGGATTGGGGAATGGG
mGolm1-qR:TCCAGTAGTTGAAGCCTAGCA
mScd2-qF:GATCTCTGGCGCTTACTCAGC
mScd2-qR:CTCCCCAGTGGTGAGAACTC

## Sheet: PCR for genotype
Prom1-WT-F: CAGGCTGTTAGCTTGGGTTC
Prom1-WT-R: TGCTGATTGCCTTCTGTCTG
Cre-R: AGGCAAATTTTGGTGTACGG
Rosa WT F: AAAGTCGCTCTGAGTTGTTAT
Rosa WT R: GGAGCGGGAGAAATGGATATG
Rosa-EYFP/DTA Mutant R: GCGAAGAGTTTGTCCTCAACC
DTA-F: ATCCACTTTTAGTGCGAGAACCTTCGTCA
DTA-R: GAAAACTTTTCTTCGTACCACGGGACTAA
Tom-F: AGCAAGGGCGAGGAGGTCATC
Tom-R: CCTTGGAGCCGTACATGAACTGG
