# Supplementary material
Source: HighWire-hosted journal article supplement (https://gut.bmj.com/content/gutjnl-2021-324321)
Supplement: inline-supplementary-material-8 [file inline-supplementary-material-8.xlsx]

## Sheet: Sheet1
Name	Origin	Description	Publication	Authors
EMT_up	MGI (Mouse Genome Informatics) EMT: http://www.informatics.jax.org/go/term/GO:0001837	A transition where an epithelial cell loses apical/basolateral polarity, severs intercellular adhesive junctions, degrades basement membrane components and becomes a migratory mesenchymal cell. Annotated terms with "positive".	-	-
EMT_down	MGI (Mouse Genome Informatics) EMT: http://www.informatics.jax.org/go/term/GO:0001837	A transition where an epithelial cell loses apical/basolateral polarity, severs intercellular adhesive junctions, degrades basement membrane components and becomes a migratory mesenchymal cell. Annotated terms with "negative".	-	-
Chiang et al._proliferation_up	MSigDB (CHIANG_LIVER_CANCER_SUBCLASS_PROLIFERATION_UP): https://www.gsea-msigdb.org/gsea/msigdb/cards/CHIANG_LIVER_CANCER_SUBCLASS_PROLIFERATION_UP	Top 200 marker genes up-regulated in the 'proliferation' subclass of hepatocellular carcinoma (HCC); characterized by increased proliferation, high levels of serum AFP [GeneID=174], and chromosomal instability.	Pubmed: 18701503	Chiang et al. 2008, Cancer Res.
Chiang et al._proliferation_down	MSigDB (CHIANG_LIVER_CANCER_SUBCLASS_PROLIFERATION_DN): https://www.gsea-msigdb.org/gsea/msigdb/cards/CHIANG_LIVER_CANCER_SUBCLASS_PROLIFERATION_DN	Top 200 marker genes down-regulated in the 'proliferation' subclass of hepatocellular carcinoma (HCC); characterized by increased proliferation, high levels of serum AFP [GeneID=174], and chromosomal instability.	Pubmed: 18701503	Chiang et al. 2008, Cancer Res.
Liu et al._ES_like	Embryonic-like tumor signature.	Embryonic-like subtype of liver cancer reveals oncofetal properties. The genes in E2f1 core module and related signaling pathway signatures, total 35 genes, were included in this gene set.	Pubmed: 32123069	Liu et al. 2019, PNAS.
Hallmark_MTORC1	MSigDB (HALLMARK_MTORC1_SIGNALING): https://www.gsea-msigdb.org/gsea/msigdb/cards/HALLMARK_MTORC1_SIGNALING	Genes up-regulated through activation of mTORC1 complex.	Pubmed: 26771021	Liberzon et al. 2015, Cell Syst (MSigDB Team)
NFE2L2.V2	MSigDB (NFE2L2.V2): https://www.gsea-msigdb.org/gsea/msigdb/cards/NFE2L2.V2	The transcription factor NRF2 (NFE2L2), induces a cytoprotective response to oxidative stresses and its mutations confer constitutive activation in cancer. We generated a gene set representing activation of NFE2L2, as represented by genes downregulated by NFE2L2 knockout using the data from Malhotra et al. D, et al. Nucleic Acids Res. 2010;38:5718-5734.	Pubmed: 27088724	Kim et al. 2016, Nat Biotechnol.
